# Supplementary material for: Tussah silkmoth pupae improve anti-tumor properties ofCordyceps militaris(L.) Link by increasing the levels of major metabolite cordycepin
Source: Royal Society of Chemistry journal article supplement (doi:10.1039/c8ra09491h), 2019-01-01
Supplement: c8ra09491h1.pdf [file c8ra09491h1.pdf]

Table S1. Unique features of KEGG pathway among three groups

***Cordyceps militaris* (L.) Link cultured on Tussah silkworm pupae**

Biosynthesis of amino acids

Biosynthesis of plant secondary metabolites

Non-alcoholic fatty liver disease (NAFLD)

Phenylalanine, tyrosine and tryptophan biosynthesis

Lysine biosynthesis

Meiosis - yeast

Synthesis of 3'-deoxyadenosine

Insulin signaling pathway

Ascorbate and aldarate metabolism

Protein digestion and absorption

Epithelial cell signaling in Helicobacter pylori infection

FoxO signaling pathway

Lysine degradation

Aminoacyl-tRNA biosynthesis

2-Oxocarboxylic acid metabolism

Type II diabetes mellitus

Cysteine and methionine metabolism

Prolactin signaling pathway

Insulin secretion

HIF-1 signaling pathway

Penicillin and cephalosporin biosynthesis

Thyroid hormone synthesis

Atrazine degradation

Streptomycin biosynthesis

Insect hormone biosynthesis

Stilbenoid, diarylheptanoid and gingerol biosynthesis

Cutin, suberine and wax biosynthesis

Biotin metabolism

Linoleic acid metabolism

Glycolysis / Gluconeogenesis

C5-Branched dibasic acid metabolism

Novobiocin biosynthesis

Butirosin and neomycin biosynthesis

Vitamin digestion and absorption

Toluene degradation

Nicotinate and nicotinamide metabolism

Indole alkaloid biosynthesis

Biosynthesis of unsaturated fatty acids

Benzoate degradation

Biosynthesis of alkaloids derived from ornithine, lysine and nicotinic acid

Flavonoid biosynthesis

Tropane, piperidine and pyridine alkaloid biosynthesis

Glucosinolate biosynthesis

Ubiquinone and other terpenoid-quinone biosynthesis

Amino sugar and nucleotide sugar metabolism

Steroid hormone biosynthesis

Polycyclic aromatic hydrocarbon degradation

Degradation of aromatic compounds

***Cordyceps militaris (L.) Link* cultured on rice**

Lipoic acid metabolism

Taurine and hypotaurine metabolism

Riboflavin metabolism

Styrene degradation

Fructose and mannose metabolism

Pentose and glucuronate interconversions

***Cordyceps sinensis***

Plant hormone signal transduction

Parkinson's disease

Oxidative phosphorylation

Salivary secretion

Carbon fixation in photosynthetic organisms

Vascular smooth muscle contraction

Peptidoglycan biosynthesis

Pantothenate and CoA biosynthesis

Glycine, serine and threonine metabolism

Note: KEGG, Kyoto Encyclopedia of Genes and Genomes, a collection of databases dealing with biological pathways and chemical substances, were used for data analysis in metabolomics.
